# Supplementary material for: Quick and reversible photocrosslinking reaction of 3-cyanovinylcarbazole nucleoside in a DNA triplex
Source: Royal Society of Chemistry journal article supplement (doi:10.1039/c3ob40915e), 2013-01-01
Supplement: c3ob40915e.pdf [file c3ob40915e.pdf]

## Supplementary Information

### Quick and Reversible Photocrosslinking Reaction of 3-Cyanovinylcarbazole Nucleoside in DNA Triplex

Kenzo Fujimoto,<sup>\*a,b</sup> Hiroki Yoshinaga,<sup>a</sup> Yasumasa Yoshio<sup>a</sup> and Takashi Sakamoto<sup>a</sup>

<sup>a</sup>School of Materials Science, Japan Advanced Institute of Science and Technology, 1-1 Asahi-dai, Nomi, Ishikawa 923-1292, Japan.

<sup>b</sup>Research Center for Bio-Architecture, Japan Advanced Institute of Science and Technology, 1-1 Asahi-dai, Nomi, Ishikawa 923-1292, Japan.

### General Method

Mass spectra were recorded on a Voyager-DE PRO-SF, Applied Biosystems. Irradiation was performed by UV-LED (366 nm, 1,600 mW/cm<sup>2</sup>; ZUV, OMRON, Japan). CD spectra were measured on a JASCO J-720 spectropolarimeter. HPLC was performed on an InertSustain<sup>TM</sup> C18 column (GL Science, 5 μm, 10 × 150 mm) or an InertSustain<sup>TM</sup> C18 column (GL Science, 5 μm, 4.6 × 150 mm) with a JASCO PU-980, HG-980-31, DG-980-50 system equipped with a JASCO UV 970 detector at 260 nm. Reagents for the DNA synthesizer such as A, G, C, T-β-cyanoethyl phosphoramidite, and CPG support were purchased from Glen Research. Cy3-labeled ODNs and unmodified ODNs were purchased from Fasmac (Japan) and used without further purification.

### Preparation of ODNs

ODN sequences were synthesized by the conventional phosphoramidite method using an automated DNA synthesizer (3400 DNA synthesizer, Applied Biosystems, CA). <sup>CNV</sup>K phosphoramidite was prepared according to the literature method (Y. Yoshimura K. Fujimoto, *Org. Lett.*, 2008, **10**, 3227.). The coupling efficiency was monitored with a trityl monitor. The coupling efficiency of a crude mixture of <sup>CNV</sup>K showed a 97% yield. The coupling time of a crude mixture of <sup>CNV</sup>K was 999 sec. They were deprotected by incubation with 28% ammonia for 4 h at 65 °C and purified on a Chemcobond 5-ODS-H column (10 × 150 mm) by reverse phase HPLC; elution was with 0.05 M ammonium formate containing 3-25% CH<sub>3</sub>CN, linear gradient (30 min) at a flow rate of 3.0 mL/min. Preparation of ODNs was confirmed by MALDI-TOF-MS analysis. MALDI-TOF-MS: calcd. 13476.24 for C\_K2 [(M + H)<sup>+</sup>], found 13479.07; calcd. 13476.24 for C\_K4 [(M + H)<sup>+</sup>], found 13480.17; calcd. 13476.24 for C\_K7 [(M + H)<sup>+</sup>], found 13476.54; calcd. 13476.24 for C\_K11 [(M + H)<sup>+</sup>], found 13473.19; calcd. 13668.35 for G\_K34 [(M + H)<sup>+</sup>], found 13668.76; calcd. 13668.35 for G\_K38 [(M + H)<sup>+</sup>], found 13668.84; calcd. 13668.35 for G\_K40 [(M + H)<sup>+</sup>], found 13663.28; calcd. 13668.84 for G\_K43 [(M + H)<sup>+</sup>], found 13664.04; calcd. 13702.33 for AT<sub>-2</sub> [(M + H)<sup>+</sup>], found 13703.79; calcd. 13702.33 for AT<sub>-1</sub> [(M + H)<sup>+</sup>], found 13701.18; calcd. 13718.33 for AT<sub>0</sub> [(M + H)<sup>+</sup>], found 13723.34; calcd. 13702.33 for AT<sub>+1</sub> [(M + H)<sup>+</sup>], found 13702.71; calcd. 13702.33 for AT<sub>+2</sub> [(M + H)<sup>+</sup>], found 13705.81; calcd. 13719.32 for GC [(M + H)<sup>+</sup>], found 13719.04; calcd. 13668.35 for G\_K27 [(M + H)<sup>+</sup>], found 13666.69; calcd. 13735.39 for G\_K27+43 [(M + H)<sup>+</sup>], found 13732.40; calcd. 6756.24 for NFκB-TFO [(M + H)<sup>+</sup>], found 6752.18.

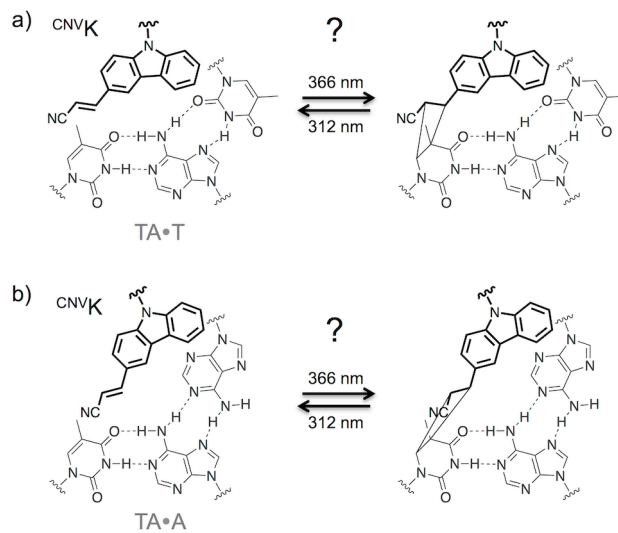

Figure S1. Schematic drawing of the reversible photocrosslinking reaction of  $\text{CNVK}$  in parallel triplex (a) and antiparallel triplex (b)

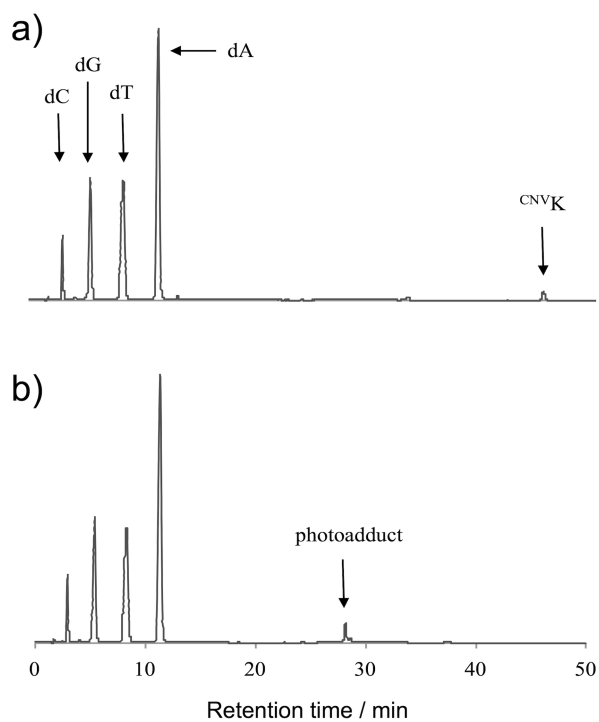

Figure S2. Reversed-phase HPLC analysis of the TFO (G\_K40) after the nuclease and phosphatase treatment. (a) Before the 366 nm photoirradiation. (b) After the 10 sec of 366 nm photoirradiation at 0°C. HPLC was performed with 50 mM aq. ammonium formate / MeCN gradient: 1–50% in 50 min on a reversed-phase ODS column.

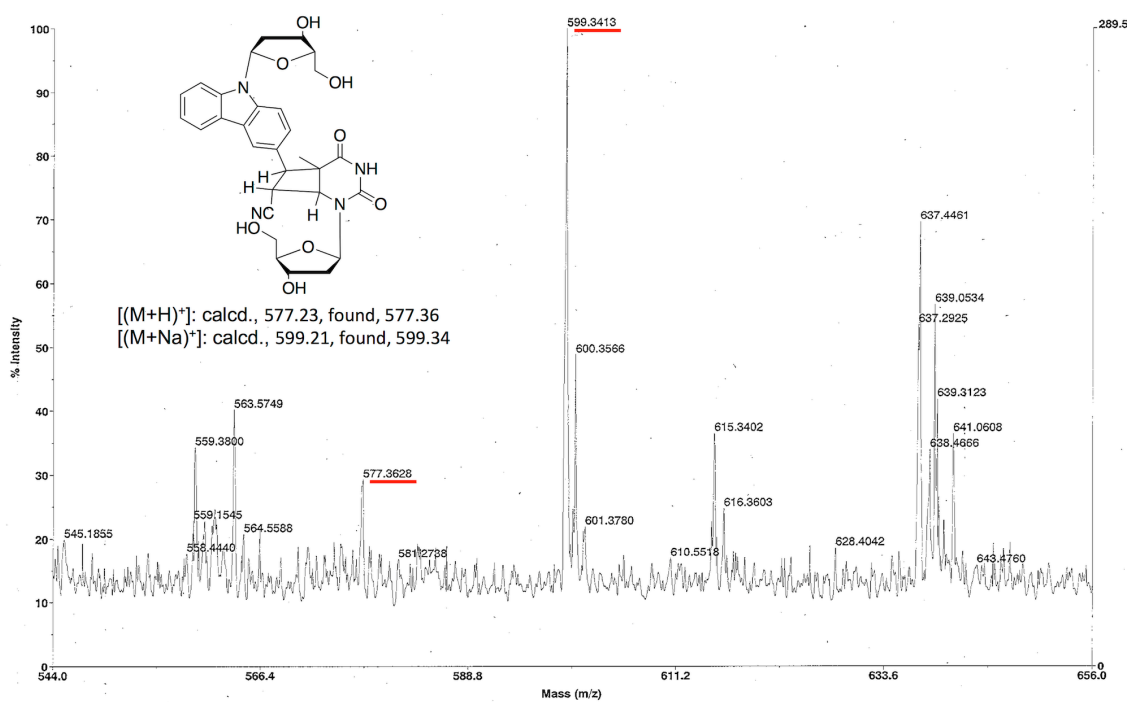

Figure S3. MALDI-TOF-Mass spectrum of the photoadduct purified by reversed-phase HPLC shown in Fig. S2

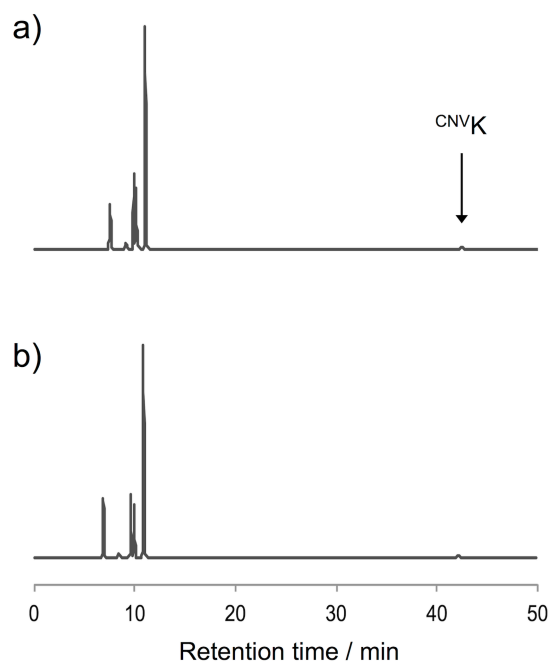

Figure S4. Reversed-phase HPLC analysis of the TFO (C\_K7) after the nuclease and phosphatase treatment. (a) Before the 366 nm photoirradiation. (b) After the 10 sec of 366 nm photoirradiation at 0°C. HPLC was performed with 50 mM aq. ammonium formate / MeCN gradient: 0–50% in 50 min on a reversed-phase ODS column.

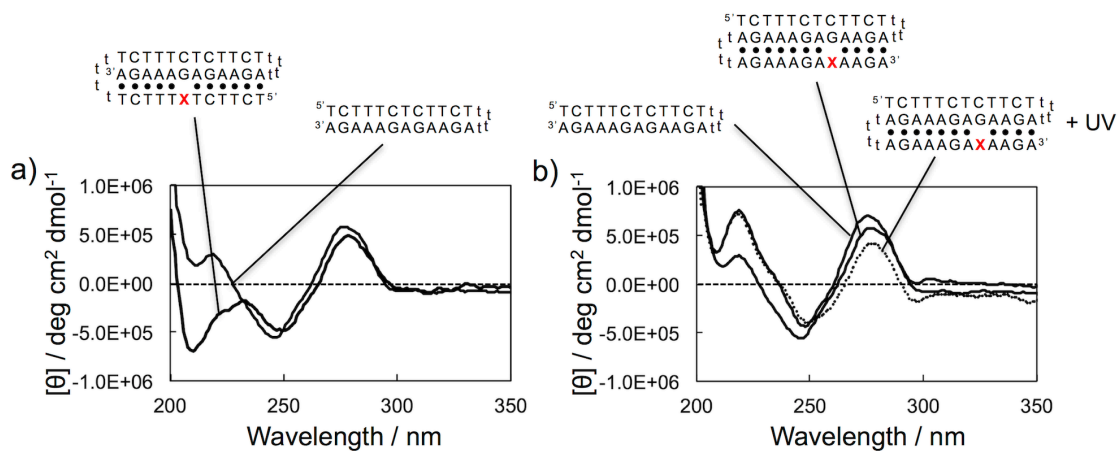

Figure S5. Circular dichroism spectra of intramolecular TFOS, C\_K7 (a) and G\_K40 (b). [TFO] = 2  $\mu$ M in 50 mM Acetate buffer (pH 5.0) containing 100 mM NaCl (for C\_K7) or in 50 mM Na-cacodylate buffer (pH 7.4) containing 100 mM NaCl (for G\_K40).

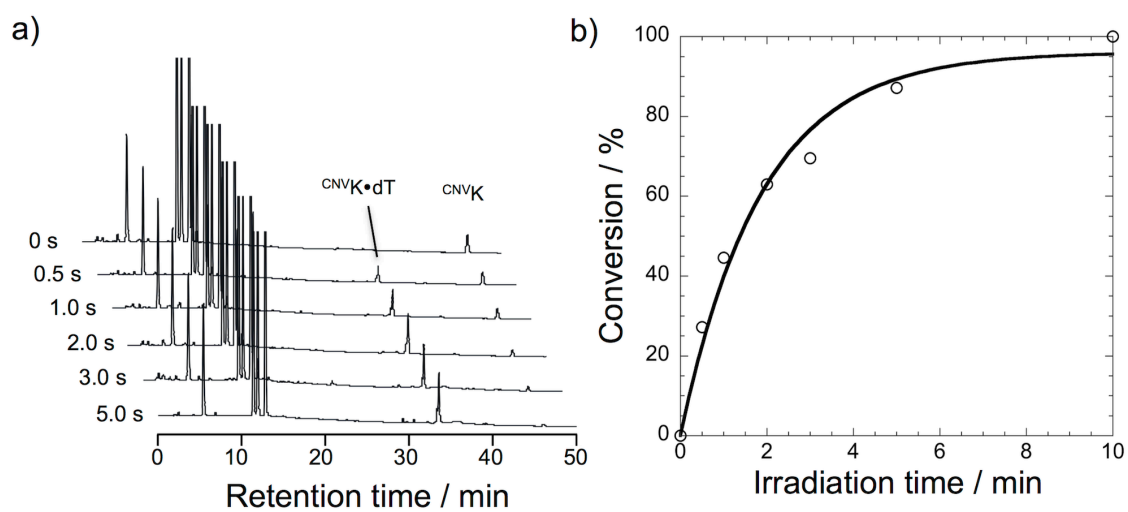

Figure S6. Reversed-phase HPLC analysis of G\_K34 after the nuclease and phosphatase treatment. HPLC was performed with 50 mM aq. ammonium formate / MeCN gradient: 0–50% in 50 min on a reversed-phase ODS column.



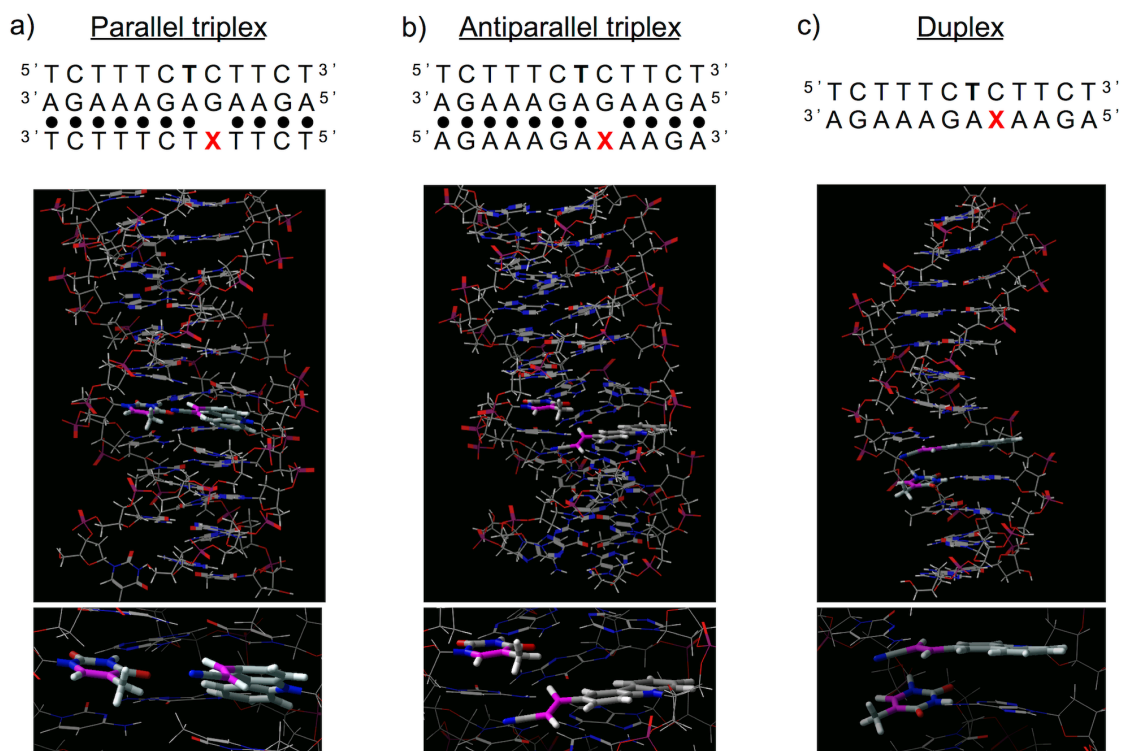

Figure S7. Predicted energy minimized structures of parallel triplex (a), antiparallel triplex (b) and duplex (c) containing <sup>CNV</sup>K. Bold nucleobases were presented with tubular form in the structure models.

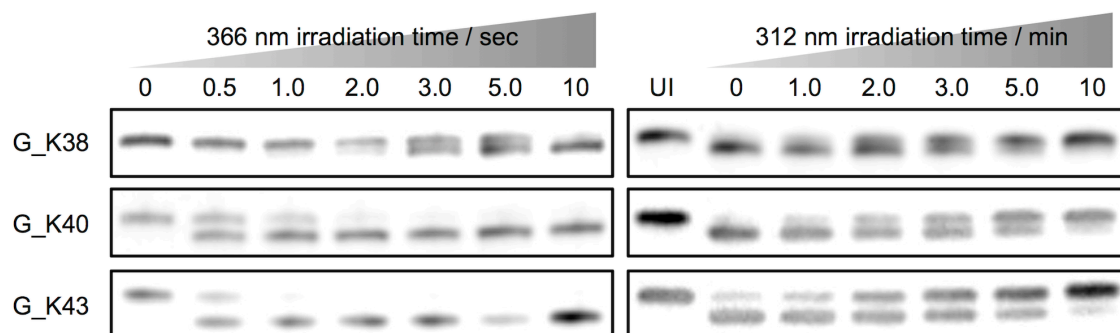

Figure S8. Denaturing PAGE analysis of the intramolecular TFOs after the different time periods of photoirradiation. Electrophoresis was performed on a polyacrylamide gel containing 12% acrylamide, 25% formamide and 7.0 M urea (160 V, 90 min) in 1x TBE buffer. After the electrophoresis, the gel was stained with SYBR® Gold and imaged by a gel imager (LAS 3000). [TFO] = 1  $\mu$ M in 50 mM Na-cacodylate buffer (pH 7.4) containing 100 mM NaCl. 366 and 312 nm irradiation was performed at 0°C and 60°C, respectively.

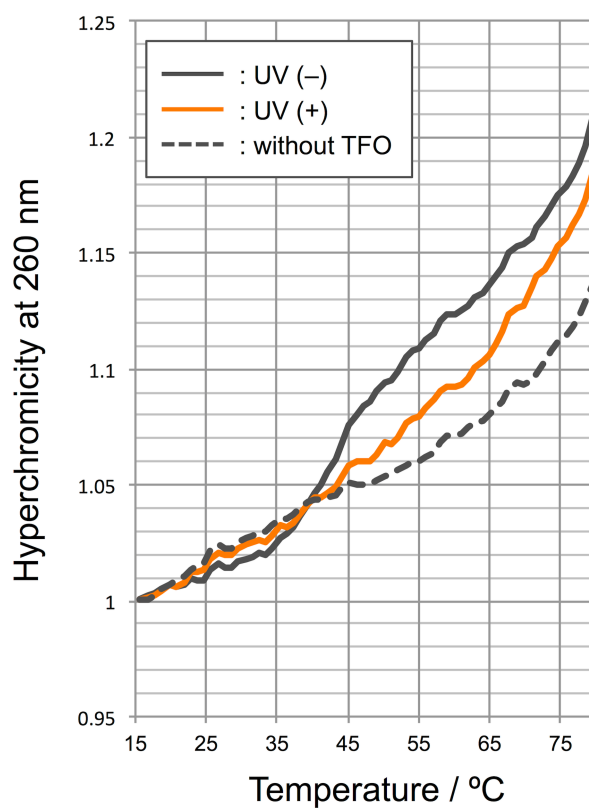

Figure S9. UV melting profiles of the intermolecular triplex before and after the photocrosslinking. [NFkB-TFO] = [dsDNA] = 2  $\mu$ M in 10 mM Na-cacodylate buffer (pH 7.2) containing 100 mM NaCl and 10 mM MgCl<sub>2</sub>. Photoirradiation was performed for 2 sec at 37°C.
